# Supplementary material
Source: publisher figshare collection journal article supplement (https://geolsoc.figshare.com/ndownloader/files/35521766)
Supplement: Supplementary file 1 [file 35521766]

## Sheet: Melt inclusions
LA-ICP-MS analyses of melt inclusions
Sample	SiO2(Wt%)	TiO2(Wt%)	Al2O3(Wt%)	FeO(Wt%)	MnO(Wt%)	MgO (Wt%)	CaO(Wt%)	Na2O (Wt%)	K2O(Wt%)	P2O5(Wt%)	Sc(ppm)	V(ppm)	Cr(ppm)	Co(ppm)	Ni(ppm)	Cu(ppm)	Zn(ppm)	Ga(ppm)	Rb(ppm)	Sr(ppm)	Y(ppm)	Zr(ppm)	Nb(ppm)	Cs(ppm)	Ba(ppm)	La(ppm)	Ce(ppm)	Pr(ppm)	Nd(ppm)	Sm(ppm)	Eu(ppm)	Gd(ppm)	Tb(ppm)	Dy(ppm)	Ho(ppm)	Er(ppm)	Tm(ppm)	Yb(ppm)	Lu(ppm)	Hf(ppm)	Ta(ppm)	Pb(ppm)	Th(ppm)	U(ppm)
MSU 07 a MI 1	49.1818	1.73621	16.6828	10.1545	0.156695	5.50837	12.6866	3.21433	0.443188	0.235515	34.6333	258.3	43.2216	41.9298	57.3111	85.042	77.1747	19.2869	8.26403	317.917	26.4835	108.637	13.2548	0.171524	93.4	10.8781	23.2786	3.2002	15.5965	4.47209	1.453	4.82917	0.873765	4.43287	1.02045	2.66069	0.368012	2.34028	0.403408	2.94588	0.820897	0.843153	1.02218	0.231681
MSU 07 a MI 2	50.4852	1.64072	16.1708	9.50642	0.151919	5.78301	12.6805	2.97574	0.374666	0.231033	31.9217	250.904	45.418	47.3823	77.8305	87.4209	78.8777	19.987	7.27666	310.413	26.6665	109.111	13.5133	0.0212088	87.6973	9.78137	21.8737	3.15748	15.4376	3.72772	1.38677	4.40998	0.806023	4.45636	0.87041	2.28344	0.362393	1.95352	0.304058	2.87493	0.685424	0.894592	0.880917	0.240275
MSU 07 a MI 3	51.0319	1.60488	16.1416	9.80821	0.151688	5.38406	11.9918	3.23044	0.405925	0.249508	35.904	237.712	42.5824	44.7818	71.7343	90.7917	80.1613	22.0018	7.8386	306.141	27.5325	113.017	13.0736	0.129908	85.854	10.7925	21.9429	3.15234	16.4854	4.06071	1.45021	4.9554	0.762852	5.46996	1.05656	2.73407	0.427058	2.62764	0.332236	3.26532	0.773478	0.941196	0.93697	0.258157
MSU 07 a MI 4	50.6439	1.68396	15.8279	9.87527	0.160006	5.89573	12.1585	3.15564	0.39663	0.202408	34.1228	248.236	45.9591	44.5885	79.5187	82.9136	65.8364	18.6418	7.50305	304.788	23.8066	104.47	11.9326	0.0744129	81.3717	9.13351	22.1899	3.13051	15.104	3.85917	1.38047	4.86108	0.759526	4.10263	0.885671	2.31535	0.336188	2.22647	0.264081	2.4363	0.784962	0.833925	0.934804	0.221571
MSU 05 MI 1	52.7006	1.30694	15.9381	9.39132	0.160747	4.23164	10.9756	4.00032	0.898022	0.396691	32.088	267.355	106.253	32.6733	84.0832	39.8023	71.7937	19.9855	16.9718	386.797	28.4511	130.79	32.3316	0.237297	206.278	20.7594	36.4769	4.92622	20.5164	5.17258	2.02242	4.72828	0.819022	5.6391	0.9926	2.92655	0.395352	3.17375	0.403252	3.4238	2.16138	2.08807	2.41087	0.59444
MSU 05 MI 2	48.23	1.40553	17.3226	9.86253	0.1802	4.54383	12.065	5.07052	1.02999	0.28968	33.5329	261.738	28.6747	32.7278	21.125	31.5879	60.916	19.9844	18.5618	451.361	33.9182	151.93	31.1852	0.282622	233.793	22.6597	37.9074	5.61428	20.3265	6.18666	2.02591	3.885	0.824469	4.5706	1.08225	2.86037	0.329658	3.12487	0.287078	3.46685	2.02444	2.07821	2.52641	0.612928
MSU 07b MI 1	48.3354	1.93531	18.1208	9.28353	0.151087	5.55842	12.2493	3.10198	0.806216	0.45797	34.1543	275.323	43.5892	38.5966	46.3278	65.4861	69.2359	19.1992	18.2891	433.743	27.1169	137.367	29.5501	0.234704	200.615	20.1975	40.0541	4.98785	19.8486	5.34136	1.71424	4.88736	0.937705	4.03122	0.994377	2.63698	0.529735	2.31754	0.448153	3.75983	1.65061	1.64257	2.26475	0.453429
MSU 07b MI 2	50.7751	1.6834	16.6154	9.06655	0.14493	5.77277	11.6467	3.10134	0.724545	0.469233	34.8006	256.405	42.8322	41.5839	73.4567	51.4437	68.2966	17.5478	16.4901	415.967	23.6434	134.389	27.6604	0.128323	214.486	19.4823	36.1494	4.97274	18.5004	4.5214	1.81003	4.19174	0.792954	4.78505	1.12371	2.75129	0.367234	2.35111	0.264204	3.51198	2.3308	1.41368	2.30693	0.454995
MSU 07b MI 3	49.1704	1.80868	17.6708	8.96583	0.147644	5.58098	12.4039	3.10384	0.788251	0.359613	41.4473	252.62	44.2329	40.6166	53.7545	64.8997	61.4176	19.2692	15.2558	415.147	27.1793	138.643	27.0212	0.175855	213.161	19.8456	38.765	4.61663	20.9695	4.92972	1.78998	5.8351	0.76152	5.11631	0.999471	2.2289	0.43411	2.71508	0.36055	3.41089	1.7274	1.59156	2.38285	0.559681
MSU 07b MI 4	48.1528	1.78342	17.7601	9.17903	0.157248	5.95771	12.3396	3.31846	0.827386	0.524249	34.4855	264.224	42.0129	37.7729	54.4946	93.4235	61.4081	18.7489	18.5362	399.116	27.3673	135.347	29.5552	0.288833	201.661	19.0855	37.0816	4.78746	21.0868	4.77051	1.83304	4.94479	0.769294	5.10585	0.966776	2.4502	0.403562	2.09984	0.354969	3.50704	1.8058	1.7285	2.22934	0.506514
MSU 06 MI 1	48.8388	2.14725	16.7186	10.2974	0.164611	5.12695	12.1275	3.4915	0.717254	0.370061	35.7641	290.533	45.5663	40.5598	52.5823	57.6288	71.155	19.5153	15.0148	406.516	30.9278	160.447	26.3448	0.260532	185.609	18.1933	37.4015	5.24746	23.4947	5.31931	2.03508	5.78214	0.908053	5.88399	1.11647	3.1424	0.477987	2.9457	0.45065	3.86989	1.50762	1.5581	2.33639	0.459008
MSU 06 MI 2	48.902	2.14884	17.2023	10.26	0.16993	5.42155	11.0679	3.72635	0.766203	0.334945	35.902	291.292	46.2529	38.2017	46.693	59.459	78.2851	20.0852	14.2982	404.747	32.9322	159.101	27.0561	0.257461	205.526	19.6617	38.568	5.21924	22.3137	5.06339	1.88426	6.23516	1.02617	5.26004	1.21719	3.05775	0.438262	2.9289	0.481326	3.26703	1.5068	1.78097	2.03121	0.49664
MSU 06 MI 3	49.0243	2.14215	17.4399	9.95004	0.173615	5.17695	11.5164	3.48646	0.73302	0.357105	33.6986	295.244	44.4501	40.1128	51.9022	54.4995	68.4968	19.957	15.4075	400.191	32.7508	150.832	25.7653	0.173738	187.694	19.2335	39.8072	4.79342	20.5757	5.22356	1.72354	5.69749	0.925725	6.2293	0.992498	2.96629	0.513314	3.49501	0.4341	3.81459	1.48839	1.75427	2.23901	0.435103
MSU 06 MI 4	48.6846	2.03818	17.0861	10.3873	0.17831	5.76845	10.701	3.94176	0.805218	0.40898	31.6783	286.196	46.3816	39.52	49.2956	99.7647	59.552	21.3994	16.0559	426.844	33.0689	158.45	24.1976	0.206382	205.44	19.9668	34.6582	4.99861	22.8529	5.53805	1.88619	5.69415	1.03551	6.4134	1.15075	2.76681	0.445386	2.46583	0.415403	3.99578	1.58095	3.16287	1.9337	0.418152
MSU 02 MI 1	48.5272	2.45609	16.8447	11.3365	0.178025	4.98901	10.7865	3.72099	0.869674	0.291267	32.3256	303.147	35.7106	39.291	42.7906	61.6645	88.1563	19.3989	16.8667	390.294	32.0348	175.592	30.044	0.308801	232.027	22.2728	41.8684	5.5103	24.278	5.32996	1.84817	6.72076	1.03301	6.26453	1.28514	3.00531	0.480654	2.9052	0.366541	4.02897	2.05965	1.76355	2.78589	0.550593
MSU 02 MI 2	48.7846	2.40446	16.8384	11.4602	0.181302	5.08759	10.3128	3.62156	0.876663	0.43241	35.6035	291.45	38.3165	36.1601	41.3235	58.1983	90.8738	22.3984	17.2103	376.032	33.0247	163.083	29.935	0.248534	226.508	21.1635	41.7059	5.187	23.4996	5.01985	1.89344	6.58019	1.10644	6.31253	1.23053	3.52134	0.464509	2.52531	0.454947	3.66916	1.63156	1.95807	2.52391	0.549631
MSU 02 MI 3	49.574	2.47653	16.3759	11.3484	0.177836	4.81975	10.4585	3.5245	0.916693	0.327925	31.7529	281.676	37.193	36.3583	43.5404	58.9535	87.1577	19.3196	18.4482	374.577	32.0898	177.906	29.3048	0.293944	221.513	20.0816	39.1386	5.23361	24.4044	5.79668	1.85395	5.94259	1.03711	5.89395	1.22272	3.73561	0.474021	2.90526	0.428577	4.39514	1.74098	1.71486	2.42771	0.563656
MSU 01 MI 1	48.3634	2.2466	16.8769	10.9358	0.172727	5.75498	10.801	3.44635	1.02358	0.378633	31.8163	316.534	18.914	43.6184	53.6511	82.7649	94.7207	21.3563	20.8665	440.033	31.4306	152.166	36.3645	0.370738	280.343	23.0645	44.4009	5.64703	21.9572	5.55536	1.92388	6.10319	0.801531	5.18167	1.14094	2.88201	0.435479	2.67892	0.3457	3.47807	2.06075	2.02911	3.34636	0.690736
MSU 01 MI 2	48.9971	2.15992	16.5541	10.7555	0.179063	5.69962	11.0688	3.38306	0.958556	0.244273	33.3319	314.052	18.4508	43.0159	49.8714	81.548	83.1262	18.1914	22.3991	429.067	30.0908	153.541	37.4053	0.348492	261.527	23.8376	44.1506	5.14159	24.705	5.36326	1.56088	5.51178	0.934263	5.1676	1.07205	2.9602	0.484038	2.63626	0.40685	4.03401	2.28707	2.0326	3.09782	0.634962
MSU 01 MI 3	47.5997	2.16798	16.803	11.2841	0.18332	5.92459	11.0768	3.62295	1.01763	0.319897	34.5205	328.19	19.9867	46.4977	57.3271	82.2583	88.6088	20.202	22.2143	452.231	29.6536	150.139	35.8816	0.335915	270.927	23.756	43.9008	5.39933	24.0446	5.67029	1.79302	5.99853	0.902104	5.15973	1.0823	3.12519	0.446754	3.1339	0.471757	3.88263	2.28933	2.01433	3.20182	0.74559
MSU 01 MI 4	47.6283	2.234	17.4416	10.813	0.169163	5.94964	10.9816	3.46548	0.993978	0.323209	28.2219	321.841	18.5404	43.8648	51.5657	83.6107	91.1315	20.7486	22.4397	438.684	30.6728	148.558	35.9136	0.281543	267.526	23.4223	46.4541	5.34947	23.4374	6.16314	1.68414	6.09369	0.810248	5.51477	1.16201	3.09873	0.427316	2.60194	0.376111	3.61811	1.95568	2.17126	3.33432	0.675206
MSU 04 MI 1	49.7347	2.32011	16.5422	11.0823	0.168154	5.10851	10.2293	3.51469	0.975533	0.324567	33.5175	313.391	23.7391	43.9341	42.6177	54.2289	98.2476	22.1308	19.1496	454.364	30.2975	150.561	29.7904	0.409964	246.147	22.0572	40.6375	4.77709	25.2559	5.0729	1.82565	5.98628	0.833184	6.45693	0.97151	3.54535	0.528458	2.56167	0.413311	3.04707	1.7934	2.05783	2.61258	0.540669
MSU 04 MI 2	49.1422	2.12386	17.1315	10.5799	0.175814	4.90759	10.5706	3.91986	1.05742	0.391271	39.3337	309.359	26.3331	40.5091	45.6557	66.8982	77.8832	24.0779	20.2603	428.96	33.952	158.892	33.8369	0.339637	240.353	21.6248	41.0981	5.48401	22.8377	5.79458	1.7465	7.76882	0.874821	5.70907	0.908029	3.40115	0.420971	2.70832	0.321644	4.1208	2.08546	2.92016	2.52586	0.559721
MSU 07 a MI 4	51.8034	1.62182	15.9992	9.5417	0.14912	5.28744	11.8814	3.06295	0.395624	0.257306	35.5201	237.68	44.2967	41.6139	56.3206	85.7465	70.8619	19.457	7.68358	287.653	25.0024	107.382	12.7906	0.133699	80.61	9.74639	22.0882	3.08907	15.1706	4.28787	1.45328	4.86747	0.81582	4.69397	1.02277	2.44164	0.452921	2.43518	0.360172	2.17092	0.834985	0.949117	0.977283	0.189136
Detection Limit	1.0552	0.000443803	0.00135209	0.00161842	4.91742e-05	0.00106614	0.086296	0.00230981	0.00729508	0.0176367	0.415998	0.0839225	0.247731	0.0475962	0.500556	0.250731	0.928695	0.063491	0.206109	0.0322962	0.0215472	0.0256757	0.020351	0.0238487	0.170387	0.00672393	0.00837654	0.00505588	0.0333236	0.0388043	0.00650615	0.0352054	0.00489658	0.0118682	0.00407607	0.0168865	0.00474538	0.0170678	0.00524125	0.0156383	0.00561909	0.0185094	0.001	0.00251115
Detection limits were calculated as 3x the relative standard deviation of all gas blank measurements (which were collected after each standard and sample)

## Sheet: Olivine
LA-ICP-MS analyses of olivine
Sample	SiO2(Wt%)	TiO2(Wt%)	Al2O3(Wt%)	FeO(Wt%)	MnO(Wt%)	MgO (Wt%)	CaO(Wt%)	Na2O (Wt%)	Sc(ppm)	V(ppm)	Cr(ppm)	Co(ppm)	Ni(ppm)	Cu(ppm)	Zn(ppm)
MSU 04 oli 1	38.9511	0.0177596	0.0680201	20.4578	0.305392	39.774	0.275736	0.101552	6.72297	10.2536	28.9155	191.807	1024.87	2.02206	67.7504
MSU 04 oli 2	39.769	0.0186818	0.064211	20.6423	0.312429	38.8964	0.268424	0.0255584	9.41632	9.95467	35.1349	206.611	1165.57	1.95345	116.517
MSU 04 oli 3	39.523	0.0249505	0.10478	21.2354	0.317882	38.3514	0.374756	0.0490508	9.49563	10.9134	29.391	210.348	1127.24	2.20826	122.351
MSU 04 oli 4	38.7294	0.0234186	0.0504603	22.0475	0.310899	38.5618	0.25376	0.0170243	8.31959	11.4199	31.8331	212.562	1194.83	2.55454	130.346
MSU 04 oli 5	38.2573	0.019714	0.165123	20.5468	0.31821	40.323	0.27545	0.0598459	8.71272	10.2967	29.1452	211.364	1014.05	5.45238	120.35
MSU 07 a oli 1	41.1091	0.0375584	0.260443	17.8858	0.253976	39.9374	0.439178	0.05774	7.11673	14.539	51.189	221.223	1220.25	5.87067	95.2376
MSU 07 a oli 2	41.1356	0.0137452	0.0863214	17.8814	0.252707	40.2593	0.358662	0.0144705	7.23284	9.35479	49.6794	223.183	1217.41	4.25031	93.8142
MSU 07 a oli 3	40.6679	0.0143019	0.0708264	18.3749	0.246101	40.2914	0.316269	0.0139243	7.64409	10.3714	49.2034	228.086	1235.12	3.67527	94.2399
MSU 07 a oli 4	41.5259	0.0129442	0.072953	17.5079	0.249778	40.3416	0.268125	0.0131317	7.59648	10.6111	52.8891	237.133	1236.93	3.81403	95.1633
MSU 07 a oli 5	40.8758	0.0162323	0.0971346	17.8288	0.255154	40.5851	0.320129	0.0168723	7.97502	10.5915	50.8345	233.085	1267.41	4.31952	95.3975
MSU 07 a oli 6	40.8773	0.012606	0.0641839	17.9726	0.251107	40.5347	0.274599	0.010291	8.30518	10.3911	52.0515	232.753	1281.36	3.60251	92.2833
MSU 05 oli 1	40.2279	0.0138404	0.0677222	22.5861	0.32547	36.4569	0.293851	0.0124492	7.8814	10.8855	39.4809	217.002	1214.76	2.26129	124.147
MSU 05 oli 2	42.1863	0.0118162	0.0378601	21.021	0.307406	36.1352	0.285628	0.00797554	7.37735	9.91945	38.5342	219.135	1151.69	1.8799	122.288
MSU 05 oli 3	40.295	0.012602	0.0402884	21.5452	0.316672	37.5331	0.239651	0.00804148	6.89518	10.0183	41.9566	207.998	1165.32	1.61837	132.695
MSU 05 oli 4	40.4732	0.0118597	0.0426226	20.9208	0.324788	37.9516	0.250998	0.00859248	8.56431	9.44868	43.9146	214.972	1217.8	2.08403	120.346
MSU 05 oli 5	39.8525	0.0119969	0.0406401	21.6371	0.330839	37.7998	0.311548	0.00719783	7.7704	10.0657	40.7279	222.005	1212.84	2.15764	120.26
MSU 05 oli 6	39.8148	0.0188268	0.118877	21.1053	0.323316	38.2907	0.283921	0.0265828	8.11408	12.3032	46.0278	224.235	1248.36	5.78233	121.533
MSU 07b oli 1	39.5807	0.0271328	0.163663	18.8272	0.258287	40.7254	0.370337	0.0350294	7.77455	11.8005	52.1169	224.066	1312.9	4.18714	97.5185
MSU 07b oli 2	38.7729	0.0136471	0.0667999	18.4664	0.259826	42.1299	0.272432	0.0122032	8.04379	10.3343	51.6845	223.04	1227.64	3.48455	92.8889
MSU 07b oli 3	39.607	0.0118946	0.0549429	18.6543	0.260901	41.1181	0.279719	0.00810681	8.35521	10.0969	52.6415	225.347	1290.45	3.78658	99.281
MSU 07b oli 4	40.3794	0.011921	0.0499081	18.1197	0.263048	40.8713	0.294123	0.00726549	8.16351	9.45236	52.4233	226.136	1222.64	3.6202	88.8596
MSU 07b oli 5	40.9574	0.0125509	0.0490368	18.2689	0.264767	40.1864	0.251927	0.00684425	8.03909	9.24651	54.7011	222.155	1219.13	4.00986	96.2358
MSU 07b oli 6	39.544	0.0109375	0.0506125	17.2459	0.2588	42.5955	0.284334	0.00667039	8.45598	9.22387	61.6359	210.872	1270.18	4.04773	86.9994
MSU 06 oli 1	40.0571	0.0298446	0.113946	19.5236	0.291954	39.5493	0.3691	0.0446812	7.87566	10.7021	64.5849	210.897	1285.78	3.04754	100.365
MSU 06 oli 2	39.587	0.0392518	0.175748	19.653	0.30303	39.7723	0.403349	0.0442041	7.77796	12.3836	76.6837	209.138	1238.93	3.49982	98.9374
MSU 06 oli 3	40.684	0.0226002	0.103191	19.8211	0.274394	38.7332	0.326964	0.0221075	8.0225	10.0678	59.6184	221.725	1227.08	2.94838	101.34
MSU 06 oli 4	39.9143	0.0170049	0.0638514	20.2357	0.291456	39.164	0.288756	0.0132641	8.02317	9.78994	58.7749	221.201	1318.34	2.93701	99.9459
MSU 06 oli 5	40.1503	0.0172307	0.0552215	19.4738	0.298902	39.7119	0.261981	0.016499	8.00422	8.982	58.9914	223.755	1296.79	6.37023	99.7046
MSU 06 oli 6	40.7228	0.0154274	0.0409168	19.7833	0.279168	38.8251	0.314167	0.00989929	7.05968	8.72071	69.0526	220.239	1307.06	2.94085	101.152
MSU 02 oli 1	39.7511	0.0244858	0.106381	21.829	0.309555	37.6382	0.29658	0.0231842	7.85505	11.1698	39.4555	216.321	1172	2.75374	120.81
MSU 02 oli 2	39.9178	0.0210601	0.080881	21.3984	0.335466	37.927	0.280175	0.0167783	7.64005	10.834	44.7171	223.405	1224.65	2.35611	127.27
MSU 02 oli 3	38.8438	0.0198133	0.0558564	22.6499	0.31708	37.7793	0.312635	0.0106067	8.06739	11.2489	41.1189	219.524	1164.33	2.05383	124.237
MSU 02 oli 4	39.1417	0.0163223	0.0414383	21.9125	0.320147	38.2734	0.27178	0.0102889	8.19597	9.82954	38.6042	209.176	1125.55	1.90736	112.42
MSU 02 oli 5	40.3199	0.019222	0.041379	21.6019	0.323403	37.3781	0.2893	0.0100504	8.04918	9.61572	40.3389	216.084	1229.06	2.31263	123.685
MSU 02 oli 6	39.9653	0.0169432	0.0322506	22.1126	0.31658	37.2574	0.274892	0.00831509	7.29398	9.11627	40.5194	208.683	1121.5	2.54896	123.937
MSU 08 oli 1	39.8867	0.0133721	0.0420092	20.7858	0.314032	38.6669	0.286698	0.00626529	8.19463	9.42616	42.0975	203.912	1135.41	2.04322	120.944
MSU 08 oli 2	38.983	0.0119256	0.0411686	21.4376	0.304356	38.9769	0.225354	0.00678005	7.3135	9.31896	39.958	206.168	1114.5	1.97662	122.594
MSU 08 oli 3	39.673	0.0129291	0.0382667	20.7209	0.304722	38.9236	0.265755	0.01199	7.52571	8.61116	41.0003	203.28	1167.94	2.07393	121.631
MSU 08 oli 4	40.475	0.0116274	0.0389995	20.4664	0.3007	38.3921	0.287777	0.00777255	7.62272	9.25684	44.965	203.42	1159.45	1.99351	124.709
MSU 08 oli 5	40.2476	0.012464	0.039709	20.5309	0.299618	38.601	0.254418	0.00790734	8.36548	9.08547	42.2855	209.262	1185.87	2.16155	120.085
MSU 08 oli 6	40.962	0.0126041	0.0382857	20.5374	0.305815	37.8874	0.234793	0.00801309	7.35309	9.92998	43.8769	205.673	1164.98	1.77629	124.276
Detection Limit	1.0552	0.000443803	0.00135209	0.00161842	4.91742e-05	0.00106614	0.086296	0.00230981	0.415998	0.0839225	0.247731	0.0475962	0.500556	0.250731	0.928695
Detection limits were calculated as 3x the relative standard deviation of all gas blank measurements (which were collected after each standard and sample)
The same major and trace element suite was analayzed in olivine as was for melt inclusions; only elements for which values were above detection limits are reported.

## Sheet: Quality assurance
Quality assurance standards run together with all olivine and melt inclusion analyses, randomly interspersed in sequence between samples.
Reference material	SiO2(Wt%)	TiO2(Wt%)	Al2O3(Wt%)	FeO(Wt%)	MnO(Wt%)	MgO (Wt%)	CaO(Wt%)	Na2O (Wt%)	K2O(Wt%)	P2O5(Wt%)	Sc(ppm)	V(ppm)	Cr(ppm)	Co(ppm)	Ni(ppm)	Cu(ppm)	Zn(ppm)	Ga(ppm)	Rb(ppm)	Sr(ppm)	Y(ppm)	Zr(ppm)	Nb(ppm)	Cs(ppm)	Ba(ppm)	La(ppm)	Ce(ppm)	Pr(ppm)	Nd(ppm)	Sm(ppm)	Eu(ppm)	Gd(ppm)	Tb(ppm)	Dy(ppm)	Ho(ppm)	Er(ppm)	Tm(ppm)	Yb(ppm)	Lu(ppm)	Hf(ppm)	Ta(ppm)	Pb(ppm)	Th(ppm)	U(ppm)
JB-2*	52.98	1.14693	14.694	12.8097	0.214638	4.66588	9.80695	2.0765	0.400604	0.094728	54.2703	568.776	25.5115	36.4959	13.5865	249.516	88.4338	14.9231	5.83931	178.507	23.0767	45.4156	0.4882	0.757454	228.128	2.26859	6.51354	1.15851	6.17987	2.23405	0.845478	3.29892	0.586334	3.89185	0.853242	2.63109	0.388255	2.5863	0.390236	1.45906	0.0378548	4.97135	0.274281	0.149215
JB-2	52.9583	1.14386	14.5306	12.851	0.216945	4.69824	10.0021	2.08806	0.400936		54.8677	558.306	24.019	36.7428	13.7352	264.423	92.1771	15.4538	6.00506	179.737	23.1077	45.3323	0.522552	0.719375	225.342	2.25952	6.43674	1.15818	6.39543	2.43691	0.817558	3.15389	0.567389	4.05065	0.878088	2.57868	0.38801	2.62021	0.379872	1.40728	0.0340317	5.16661	0.254802	0.148163
JB-2	52.9938	1.15418	14.6003	12.9279	0.215007	4.6195	9.83289	2.05397	0.405418	0.0870513	54.9828	555.527	23.8039	35.2628	12.621	292.108	93.1034	15.2631	5.88679	180.667	23.1222	45.9423	0.526762	0.788287	226.887	2.29068	6.76348	1.13327	6.3396	2.35288	0.839863	3.27447	0.589929	4.00839	0.884853	2.63326	0.383966	2.63401	0.405649	1.41216	0.0383216	5.23618	0.258328	0.152365
JB-2	52.1394	1.17417	14.8649	13.0707	0.216612	4.72582	10.0975	2.09321	0.411537	0.0961538	54.7174	559.865	24.3612	37.2152	12.8802	295.16	90.0465	15.3718	5.97599	183.977	24.1221	46.126	0.506082	0.813064	229.851	2.35061	6.71014	1.14703	6.3575	2.29372	0.87303	3.26834	0.616594	3.9875	0.878087	2.51174	0.41256	2.502	0.404491	1.51109	0.0339175	5.17286	0.251255	0.148135
JB-2	51.9455	1.18755	15.2177	13.0552	0.216845	4.81828	9.90879	2.04181	0.412982	0.0853066	56.3325	567.167	24.0484	37.1961	12.9572	307.186	93.186	14.443	5.95861	188.4	23.8556	46.8328	0.557006	0.806365	228.452	2.35614	6.80708	1.16738	6.22153	2.27156	0.903873	3.41091	0.626184	4.15516	0.878622	2.67088	0.420709	2.78623	0.399889	1.50133	0.036919	5.1185	0.25906	0.138762
Average of all JB-2 analyses	52.6034	1.16134	14.7815	12.9429	0.216009	4.70554	9.92964	2.07071	0.406295	0.0908099	55.0341	561.928	24.3488	36.5826	13.156	281.678	91.3894	15.0909	5.93315	182.257	23.4569	45.9298	0.52012	0.776909	227.732	2.30511	6.6462	1.15287	6.29878	2.31782	0.85596	3.2813	0.597286	4.01871	0.874578	2.60513	0.3987	2.62575	0.396027	1.45818	0.0362089	5.1331	0.259545	0.147328
RSD	0.00982448	0.016201	0.0185483	0.00908804	0.00508415	0.0158143	0.0121552	0.0106798	0.0142495	0.0597507	0.0140744	0.0102495	0.0279155	0.021833	0.0365041	0.0846348	0.0227725	0.0274849	0.011496	0.0218838	0.0211007	0.0132238	0.0492676	0.0498221	0.00747408	0.0197538	0.0244006	0.011382	0.0147578	0.0342115	0.0388826	0.0279135	0.0399351	0.0238716	0.0140247	0.02367	0.0419124	0.0393591	0.0274775	0.0331927	0.0580418	0.0194096	0.0339233	0.0345521
Accepted value***	53.14	1.167	14.62	12.852	0.213	4.43	9.852	2.054	0.4224	0.092***	54.08	572.4	26.65	37.57	14.77	***	***	16.62	6.4	178.2	23.56	48.25	0.565	0.8	218.1	2.281	6.552	1.129	6.392	2.266	0.836	3.123	0.5863	3.868	0.863	2.537	0.393	2.529	0.3894	1.487	0.0396	5.25	0.2576	0.1528
Accuracy	-0.0100977	-0.00485409	0.0110481	0.00707228	0.0141289	0.0621991	0.0078804	0.00813419	-0.0381267	-0.0129357	0.0176429	-0.0182944	-0.0863483	-0.0262826	-0.109275			-0.0920011	-0.072945	0.0227688	-0.00437746	-0.0480871	-0.079433	-0.0288638	0.0441629	0.0105689	0.0143765	0.0211466	-0.0145832	0.0228706	0.023876	0.0506897	0.018738	0.0389636	0.0134165	0.0268545	0.0145041	0.0382558	0.0170196	-0.0193792	-0.0856332	-0.0222671	0.00755096	-0.0358111
BHVO-2G spot**	49.692	2.74965	14.0858	10.846	0.151443	6.9173	11.5128	2.16525	0.516644	0.253089	32.3262	291.084	260.639	43.7836	125.883	135.708	97.2072	19.5469	8.24102	401.123	28.9038	177.178	18.7576	0.0686041	127.609	15.7922	35.9488	5.46909	26.2283	6.28372	2.16507	6.13138	0.993607	5.43885	0.990808	2.6914	0.327062	1.98189	0.282559	4.53029	1.22395	1.60748	1.27491	0.372567
BHVO-2G spot	48.8189	2.72618	13.948	11.1539	0.167949	7.40712	11.5567	2.31167	0.561668	0.237955	38.1321	304.457	280.812	43.0176	121.607	149.117	103.039	22.612	9.51421	410.176	28.8914	185.569	19.042	0.0709619	132.61	16.534	38.6406	5.64503	25.8164	6.74213	2.4212	7.35537	1.05567	5.99204	0.94465	3.05784	0.358251	2.02124	0.309101	4.84935	1.36814	1.78753	1.45108	0.374691
BHVO-2G spot	48.9298	2.81351	13.8644	11.2774	0.161598	7.18735	11.5594	2.27212	0.541607	0.282745	33.9317	303.374	271.287	42.6065	124.25	152.17	87.12	21.5106	10.0487	410.53	27.4037	178.451	19.4148	0.0954775	129.137	16.0284	37.7838	5.51068	25.7085	6.62247	2.22803	6.82547	1.05132	5.45014	0.989949	2.53471	0.352567	2.42399	0.306624	4.54258	1.19402	1.70388	1.31631	0.390437
BHVO-2G spot	49.6134	2.65602	13.67	11.4213	0.162797	7.0009	11.2785	2.31328	0.540786	0.233077	31.2021	306.057	255.131	43.4078	120.414	162.728	93.8119	22.1501	9.2589	410.636	26.2964	172.334	18.6366	0.115566	124.585	14.9206	37.8531	5.45956	24.0697	6.43075	2.06654	6.70732	0.986423	5.43048	0.995144	2.64466	0.324142	2.1311	0.273236	4.49794	1.21706	1.57322	1.25111	0.377988
Average of all BHVO-2Ganalyses	49.2635	2.73634	13.892	11.1747	0.160947	7.12817	11.4768	2.26558	0.540177	0.251717	33.898	301.243	266.967	43.2039	123.039	149.931	95.2946	21.4549	9.26571	408.116	27.8739	178.383	18.9628	0.0876524	128.485	15.8188	37.5566	5.52109	25.4557	6.51977	2.22021	6.75489	1.02175	5.57788	0.980138	2.73215	0.340505	2.13956	0.29288	4.60504	1.25079	1.66803	1.32335	0.378921
RSD	0.00919107	0.0237657	0.0125168	0.0219106	0.0429267	0.0305191	0.0116729	0.0306958	0.0341029	0.0888759	0.0895874	0.0227783	0.0427343	0.011721	0.020181	0.0742466	0.0697825	0.0629117	0.081835	0.0114336	0.0454057	0.0306515	0.0182456	0.253554	0.0259781	0.0426108	0.0303575	0.015496	0.0373503	0.0311374	0.0673676	0.074345	0.0360268	0.0495221	0.0242494	0.0830269	0.051118	0.0934106	0.0605808	0.0356037	0.0633766	0.0581451	0.0674882	0.0210991
Accepted value***	49.3	2.79	13.6	11.3	0.17	7.13	11.4	2.4	0.51	0.29	34	308	292	44	119	128	107	22	9.2	396	24.6	164	17.9	0.106	131	15.2	37.6	5.35	24.5	6.1	2.07	6.16	0.92	5.22	0.98	2.56	0.34	2.01	0.279	4.32	1.15	1.7	1.19	0.427
Accuracy	-0.000739756	-0.0192324	0.021474	-0.0110927	-0.053254	-0.000257147	0.00674078	-0.0560089	0.0591699	-0.132012	-0.00300017	-0.0219377	-0.0857288	-0.0180933	0.0339373	0.171335	-0.109396	-0.0247761	0.00714242	0.0305968	0.133083	0.0876994	0.0593726	-0.173091	-0.0191968	0.0407104	-0.00115507	0.0319795	0.039009	0.068814	0.072566	0.0965723	0.110603	0.0685585	0.000140428	0.0672471	0.00148639	0.064456	0.0497486	0.0659814	0.0876458	-0.0188062	0.11206	-0.112598
NMNH 11312-77 ("San Carlos olivine")	42.9852	0.0042548	0.0400928	10.1662	0.146406	46.5371	0.099352	0.0149163			2.9265	4.69125	105.007	154.839	3039.49	0.948896	54.7192
NMNH 11312-77 ("San Carlos olivine")	42.6631	0.00357768	0.0334739	10.5349	0.141594	46.4962	0.104618	0.0111214			2.98879	4.00044	92.8689	151.665	2912.92	0.450201	60.4577
NMNH 11312-77 ("San Carlos olivine")	42.8306	0.0032198	0.0360995	10.3019	0.152064	46.5547	0.110129	0.00977601			3.00533	4.38431	97.7974	140.416	3061.21	0.955814	52.9209
Average of all NMNH 11312-77 analyses	42.8263	0.00368409	0.0365554	10.3344	0.146688	46.5293	0.104699	0.0119379			2.97354	4.35867	98.5578	148.973	3004.54	0.78497	56.0326
RSD	0.00376166	0.142678	0.0911736	0.0180446	0.0357254	0.000645455	0.051469	0.223293			0.0139792	0.0794092	0.0619416	0.0508741	0.0266548	0.369363	0.0702513
Accepted value***	40.81			9.55	0.14	49.42									2907
Accuracy	-0.0494071			-0.0821319	-0.047771	0.0584917									-0.0335531
Detection Limit****	1.0552	0.000443803	0.00135209	0.00161842	4.91742e-05	0.00106614	0.086296	0.00230981	0.00729508	0.0176367	0.415998	0.0839225	0.247731	0.0475962	0.500556	0.250731	0.928695	0.063491	0.206109	0.0322962	0.0215472	0.0256757	0.020351	0.0238487	0.170387	0.00672393	0.00837654	0.00505588	0.0333236	0.0388043	0.00650615	0.0352054	0.00489658	0.0118682	0.00407607	0.0168865	0.00474538	0.0170678	0.00524125	0.0156383	0.00561909	0.0185094	0.001	0.00251115
* JB-2 run as a wide beam surface scan on a fused powder in Li4B2O7 flux. Ablation rates and raw intensities higher than melt inclusions and olivine analyses.
** Spots on BHVO-2G and NMNH 113standards run as spots under same ablation conditions, beam size and duration as melt inclusions and olivine analyses.
*** Accepted values as published on the GeoReM website, http://georem.mpch-mainz.gwdg.de, accessed in December 2018. P2O5 for JB-2 is our laboratory long-term average, Cu and Zn values for JB-2 are omitted as the fused powder method is unreliable to recover good accuracuy on these elements.
**** Detection limits were calculated as 3x the relative standard deviation of all gas blank measurements (which were collected after each standard and sample)
